# Supplementary material
Source: PubMed Central journal article supplement (PMC6943352)
Supplement: ajcr0009-2789-f5.pdf [file ajcr0009-2789-f5.pdf]

## RV-59 suppresses drug resistance and tumor growth

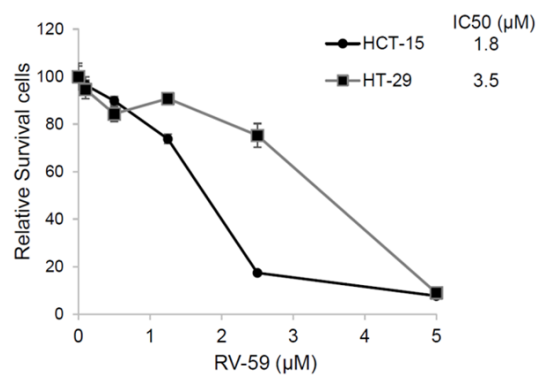

**Figure S1.** The IC<sub>50</sub> value of RV-59 for HCT-15 and HCT-29 colon cancer cells was determined from the dose-response curve of the MTT assay.
